# Supplementary material for: Excess radiation exacerbates drought stress impacts on canopy conductance along aridity gradients
Source: Copernicus journal article supplement (doi:10.5194/bg-19-4197-2022), 2022-09-08
Supplement: Supplementary file 1 [file bg-19-4197-2022-supplement.zip]

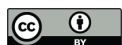

## *Supplement of*

# **Excess radiation exacerbates drought stress impacts on canopy conductance along aridity gradients**

**Jing Wang and Xuefa Wen**

*Correspondence to:* Xuefa Wen (wenxf@igsrr.ac.cn) and Jing Wang (wangjing.15b@igsrr.ac.cn)

- [bg-19-4197-2022-supplement-title-page.pdf](#)
- Supplement
  - [Supplement with track changes.docx](#)
  - [Supplement without track changes.docx](#)

The copyright of individual parts of the supplement might differ from the article licence.
