# Supplementary material for: Excess radiation exacerbates drought stress impacts on canopy conductance along aridity gradients
Source: Copernicus journal article supplement (doi:10.5194/bg-19-4197-2022), 2022-09-08
Supplement: Supplementary file 2 [file bg-19-4197-2022-supplement.zip]

Archive with 4 entries (3 files):
- Supplement/
- Supplement/Supplement without track changes.docx
- Supplement/Supplement with track changes.docx
- bg-19-4197-2022-supplement-title-page.pdf
